# Supplementary material for: Importance of Viscosity Contrast for the Motion of Erythrocytes in Microcapillaries
Source: Frontiers journal article supplement (doi:10.3389/fphy.2021.666913), 2021-05-11
Supplement: Presentation_1.PDF [file Presentation_1.PDF]

## **Supplementary information**

### **Importance of viscosity contrast for the motion of erythrocytes in microcapillaries**

**Anil K. Dasanna, Johannes Mauer, Gerhard Gompper, and Dmitry A. Fedosov**

Theoretical Physics of Living Matter, Institute of Biological Information Processing and Institute for Advanced Simulation, Forschungszentrum Jülich, 52425 Jülich, Germany

#### **Description of supplementary movies**

Different RBC states (e.g., parachute, tank-treading, tumbling) in microcapillary flow are best illustrated by movies described below. The movies correspond to the insets of Fig. 1 in the main text,  $\lambda = 5$  in all cases. For each movie, only a small segment of the corresponding simulation is displayed. The frame of reference is at the center of mass of each RBC.

**Movie S1:** The movie shows a parachute state of a RBC in microcapillary flow for  $\chi = 0.71$  and  $\dot{\gamma}^* = 0.123$ .

**Movie S2:** The movie illustrates an off-center tank-treading-like dynamics of a RBC in the tube flow for  $\chi = 0.44$  and  $\dot{\gamma}^* = 0.111$ .

**Movie S3:** The movie shows an off-center tumbling dynamics of a RBC in the tube flow for  $\chi = 0.44$  and  $\dot{\gamma}^* = 0.041$ .
